# Supplementary material for: New catalytic route to borasiloxanes
Source: Royal Society of Chemistry journal article supplement (doi:10.1039/b801013g), 2008-01-01
Supplement: b801013g.pdf [file b801013g.pdf]

## SUPPORTING INFORMATION

### New Catalytic Route to Borasiloxanes

Bogdan Marciniec,<sup>\*</sup> Jędrzej Walkowiak

*Department of Organometallic Chemistry, Faculty of Chemistry, Adam Mickiewicz*

*University, Grunwaldzka 6, 60-780 Poznań, E-mail: [marcinb@amu.edu.pl](mailto:marcinb@amu.edu.pl)*

#### General methods

<sup>1</sup>H NMR (300 MHz), <sup>13</sup>C NMR (75 MHz), <sup>29</sup>SiNMR (79 MHz) and <sup>11</sup>B NMR (96 MHz) spectra were recorded on Varian XL 300 MHz spectrometer in CDCl<sub>3</sub> or toluene-d<sub>8</sub> (C<sub>6</sub>D<sub>5</sub>CD<sub>3</sub>) solution. Chemical shifts are reported in (ppm) with reference to the residual solvent (CH<sub>2</sub>Cl) peak for <sup>1</sup>H, <sup>13</sup>C, to TMS for <sup>29</sup>Si and to BF<sub>3</sub>-Et<sub>2</sub>O for <sup>11</sup>B. Analytical gas chromatographic (GC) analyses were performed on a Varian Star 400CX with a DB-5 fused silica capillary column (30m · 0.15mm) and TCD. Mass spectra of the substrates and products were obtained by GC–MS analysis (Varian Saturn 2100T, equipped with a BD-5 capillary column (30m) and an ion trap detector. Elemental analyses were carried out by Vario EL III. The column chromatography was performed with silica gel 60 (70–230 mesh; Fluka). Toluene was dried by distillation from sodium and hexane from sodium hydride. Liquid substrates were also dried and degassed by bulb to bulb distillation. All the reactions were carried out under dry argon atmosphere.

**Comment [J1]:** All corrections were made in red colour

#### Materials

The chemicals were obtained from the following sources: toluene, dodecane, hexane, chlorodimethylphenylsilane were purchased from Fluka; CDCl<sub>3</sub> and C<sub>6</sub>D<sub>5</sub>CD<sub>3</sub> from Dr Glaser A.G. Basel., triethylsilanol, tri(*iso*-propyl)silanol, *tert*-butyldimethylsilanol were purchased from Gelest, tris(*tert*-butoxy)silanol and triphenylsilanol from Aldrich. Dimethylphenylsilanol was prepared by hydrolysis of chlorodimethylphenylsilane. 2-vinyl-[1,3,2]-dioxaborolane and 2-vinyl-[1,3,2]-dioxaborinane were synthesized according to the literature procedure with some modifications.<sup>1-2</sup> The ruthenium complexes [RuHCl(CO)(PCy<sub>3</sub>)<sub>2</sub>] (**I**), [RuHCl(CO)(PPh<sub>3</sub>)<sub>3</sub>] (**II**), [Ru(BO<sub>2</sub>C<sub>6</sub>H<sub>4</sub>)Cl(CO)(PCy<sub>3</sub>)<sub>2</sub>] (**III**) were prepared according to literature procedures.<sup>3-6</sup>

### Representative experimental procedure for *O*-borylation of silanols by vinylboronates

The glass reactor was charged under argon with dry and deoxygenated silanol ( $5 \times 10^{-4}$  mol), vinylborane ( $1 \times 10^{-3}$  –  $1.5 \times 10^{-3}$  mol), toluene (1 mL) and [Ru]-H: [RuHClCO(PCy<sub>3</sub>)<sub>2</sub>] or [RuHClCO(PPh<sub>3</sub>)<sub>3</sub>] ( $5 \times 10^{-6}$ – $1 \times 10^{-5}$  mol) and dodecane as an internal standard (5% by volume of all components) under the conditions given in Table 1 and 2. The reactions with 2-vinyl-[1,3,2]-dioxaborolane were carried out in a closed system in 100–130°C in sealed tubes, in any other cases in an open system. Reaction mixture was heated at (60–130°C) for 6–24 h. Silanol conversion was determined by GC, and after its disappearance, solvent and excess of borane were removed under vacuum and the crude product was purified by column chromatography (silica gel/hexane) or bulb to bulb distillation giving the corresponding borasiloxane.

### Experimental procedure for stoichiometric experiments

In an NMR tube 0.01 g of [Ru(BO<sub>2</sub>C<sub>6</sub>H<sub>4</sub>)Cl(CO)(PCy<sub>3</sub>)<sub>2</sub>] ( $1.2 \times 10^{-5}$  mol) and 0.0024 g of dimethyl*tert*-butylsilanol ( $1.8 \times 10^{-5}$  mol) and toluene-d<sub>8</sub> (0.6 mL) were placed under argon. The reaction was carried out in 100°C and the course of the reaction was monitored by <sup>1</sup>H NMR.

### Spectroscopic data of several borasiloxanes

#### [1,3,2]-dioxaborinan-2-yl)dimethylphenylsiloxane

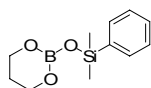

<sup>1</sup>H NMR (CDCl<sub>3</sub>; δ (ppm)): 0.41 (s, 6H, Si(CH<sub>3</sub>)<sub>2</sub>Ph), 1.90 (br, 2H, BOCH<sub>2</sub>CH<sub>2</sub>CH<sub>2</sub>O), 4.04 (br, BOCH<sub>2</sub>CH<sub>2</sub>CH<sub>2</sub>O) 7.35–7.39 (m, 3H, m,p-C<sub>6</sub>H<sub>5</sub>), 7.59–7.62 (m, 2H, o-C<sub>6</sub>H<sub>5</sub>)

<sup>13</sup>C NMR (CDCl<sub>3</sub>; δ (ppm)): -0.03 (Si(CH<sub>3</sub>)<sub>2</sub>), 27.1 (BOCH<sub>2</sub>CH<sub>2</sub>CH<sub>2</sub>O), 62.8 (BOCH<sub>2</sub>CH<sub>2</sub>CH<sub>2</sub>O), 127.5 (C<sub>6</sub>H<sub>5</sub>), 129.2 (C<sub>6</sub>H<sub>5</sub>), 133.0 (C<sub>6</sub>H<sub>5</sub>), 138.6 (C<sub>6</sub>H<sub>5</sub>)

<sup>11</sup>B NMR (CDCl<sub>3</sub>, δ (ppm)): 26.9

<sup>29</sup>Si NMR (CDCl<sub>3</sub>, δ (ppm)): 2.9

MS (EI) [*m/z* (rel. int. (%))]: 221 ((M<sup>+</sup>-15), (100)), 193 (15), 179 (8), 159 (6), 143 (11), 117 (13), 91 (18), 77(8)

### [1,3,2]-dioxaborinan-2-yl)tris(trimethylsiloxy)siloxane

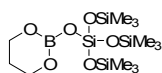

$^1\text{H NMR}$  ( $\text{CDCl}_3$ ;  $\delta$  (ppm)): 0.09 (s, 27H,  $\text{Si}(\text{OSi}(\text{CH}_3)_3)_3$ ), 1.89 (m, 2H,  $\text{BOCH}_2\text{CH}_2\text{CH}_2\text{O}$ ),  
4.015 (br,  $\text{BOCH}_2\text{CH}_2\text{CH}_2\text{O}$ )

$^{13}\text{C NMR}$  ( $\text{CDCl}_3$ ;  $\delta$  (ppm)): 1.6 ( $\text{Si}(\text{OSi}(\text{CH}_3)_3)_3$ ), 27.2 ( $\text{BOCH}_2\text{CH}_2\text{CH}_2\text{O}$ ), 62.6  
( $\text{BOCH}_2\text{CH}_2\text{CH}_2\text{O}$ )  $^{11}\text{B NMR}$  ( $\text{CDCl}_3$ ,  $\delta$  (ppm)): 28.7

$^{29}\text{Si NMR}$  ( $\text{CDCl}_3$ ,  $\delta$  (ppm)): 9.2

**MS (EI)** [ $m/z$  (rel. int. (%))]: 381 ( $M^+$ -15 (100)), 323 (25), 309 (55), 281 (41), 267 (40),  
251 (10), 193 (2)

**Anal Calcu.** for  $\text{C}_{12}\text{H}_{33}\text{BO}_6\text{Si}_4$ : C, 36.35; H, 8.39 found C, 36.76, H 8.60

### [1,3,2]-dioxaborinan-2-yl) tri(*iso*-propyl)siloxane

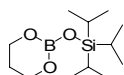

$^1\text{H NMR}$  ( $\text{CDCl}_3$ ;  $\delta$  (ppm)): 1.03 (21H,  $\text{Si}(\text{C}_3\text{H}_7)_3$ ) 1.89 (br, 2H,  $\text{BOCH}_2\text{CH}_2\text{CH}_2\text{O}$ ), 4.02 (t,  
4H  $\text{BOCH}_2\text{CH}_2\text{CH}_2\text{O}$ )

$^{13}\text{C NMR}$  ( $\text{CDCl}_3$ ;  $\delta$  (ppm)): 12.5 ( $\text{Si}(\text{CH}(\text{CH}_3)_2)_3$ ), 17.8 ( $\text{Si}(\text{CH}(\text{CH}_3)_2)_3$ ), 27.3  
( $\text{BOCH}_2\text{CH}_2\text{CH}_2\text{O}$ ), 62.8 ( $\text{BOCH}_2\text{CH}_2\text{CH}_2\text{O}$ )

$^{11}\text{B NMR}$  ( $\text{CDCl}_3$ ,  $\delta$  (ppm)): 26.6

$^{29}\text{Si NMR}$  ( $\text{CDCl}_3$ ,  $\delta$  (ppm)): 10.4

**MS (EI)** [ $m/z$  (rel. int. (%))]: 215 ( $M^+$ -43 (100)), 187 (60), 173 (10), 159 (42), 145 (20), 131  
(11), 117(15), 101 (14)

**Anal Calcu.** for  $\text{C}_9\text{H}_{21}\text{BO}_3\text{Si}$ : C, 55.81; H, 10.54 found C 56.14; H 10.73

### ([1,3,2]-dioxaborinan-2-yl)*tert*-butyldimethylsiloxane

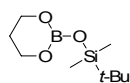

$^1\text{H NMR}$  ( $\text{CDCl}_3$ ;  $\delta$  (ppm)): 0.09 (6H, s,  $\text{Si}(\text{CH}_3)_2(\text{t-Bu})$ ), 0.88 (9H, s,  $\text{Si}(\text{CH}_3)_2(\text{C}(\text{CH}_3)_3)$ )  
1.86 (q, 2H,  $\text{BOCH}_2\text{CH}_2\text{CH}_2\text{O}$ ), 4.00 (t, 4H,  $\text{BOCH}_2\text{CH}_2\text{CH}_2\text{O}$ )

$^{13}\text{C NMR}$  ( $\text{CDCl}_3$ ;  $\delta$  (ppm)): -3.7 ( $\text{Si}(\text{CH}_3)_2(\text{t-Bu})$ ), 18.0 ( $\text{Si}(\text{CH}_3)_2(\text{C}(\text{CH}_3)_3)$ ), 25.7  
( $\text{Si}(\text{CH}_3)_2(\text{C}(\text{CH}_3)_3)$ ), 27.2 ( $\text{BOCH}_2\text{CH}_2\text{CH}_2\text{O}$ ), 62.8 ( $\text{BOCH}_2\text{CH}_2\text{CH}_2\text{O}$ )

**$^{11}\text{B}$  NMR ( $\text{CDCl}_3$ ,  $\delta$  (ppm)):** 26.8

**$^{29}\text{Si}$  NMR ( $\text{CDCl}_3$ ,  $\delta$  (ppm)):** 15.5

**MS (EI) [ $m/z$  (rel. int. (%))]:** 217 ( $M^+ + 1$  (6)), 159 (100), 131 (47), 117 (35), 101 (28)

**Anal Calcu. for  $\text{C}_{12}\text{H}_{27}\text{BO}_3\text{Si}$ :** C, 50.01; H, 9.79 found C, 50.14; H, 9.89

**[1,3,2]-dioxaborinan-2-yl)triethylsiloxane**

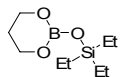

**$^1\text{H}$  NMR ( $\text{CDCl}_3$ ;  $\delta$  (ppm)):** 0.62 (6H, q,  $\text{Si}(\underline{\text{CH}_2\text{CH}_3})_3$ ) 0.88 (9H, t,  $\text{Si}(\text{CH}_2\underline{\text{CH}_3})_3$ ) 1.87 (br, 2H,  $\text{BOCH}_2\underline{\text{CH}_2\text{CH}_2}\text{O}$ ), 4.00 (t, 4H,  $\text{BOCH}_2\underline{\text{CH}_2\text{CH}_2}\text{O}$ )

**$^{13}\text{C}$  NMR ( $\text{CDCl}_3$ ;  $\delta$  (ppm)):** 5.6 ( $\text{Si}(\underline{\text{CH}_2\text{CH}_3})_3$ ), 6.7 ( $\text{Si}(\text{CH}_2\underline{\text{CH}_3})_3$ ), 27.3 ( $\text{BOCH}_2\underline{\text{CH}_2\text{CH}_2}\text{O}$ ), 62.8 ( $\text{BOCH}_2\underline{\text{CH}_2\text{CH}_2}\text{O}$ )

**$^{11}\text{B}$  NMR ( $\text{CDCl}_3$ ,  $\delta$  (ppm)):** 26.9

**$^{29}\text{Si}$  NMR ( $\text{CDCl}_3$ ,  $\delta$  (ppm)):** 15.8

**MS (EI) [ $m/z$  (rel. int. (%))]:** 187 ( $M^+ - 29$  (100)), 159 (19), 131 (29), 103 (11), 73 (9)

**[1,3,2]-dioxaborolan-2-yl) tri(*iso*-propyl)siloxane**

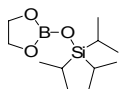

**$^1\text{H}$  NMR ( $\text{CDCl}_3$ ;  $\delta$  (ppm)):** 1.06 (br 21H,  $\text{Si}(\text{CH}(\text{CH}_3)_2)_3$ ), 4.17 (s, 4H,  $\text{BO}_2\underline{\text{C}_2\text{H}_4}$ )

**$^{13}\text{C}$  NMR ( $\text{CDCl}_3$ ;  $\delta$  (ppm)):** 12.4 ( $\text{Si}(\underline{\text{CH}}(\text{CH}_3)_2)_3$ ), 17.7 ( $\text{Si}(\text{CH}(\underline{\text{C}}\text{H}_3)_2)_3$ ), 64.6 ( $\text{BO}_2\underline{\text{C}_2\text{H}_4}$ )

**$^{11}\text{B}$  NMR ( $\text{CDCl}_3$ ,  $\delta$  (ppm)):** 31.6

**$^{29}\text{Si}$  NMR ( $\text{CDCl}_3$ ,  $\delta$  (ppm)):** 12.8

**MS (EI) [ $m/z$  (rel. int. (%))]:** 201 ( $M^+ - 43$ , (49)), 173 (57), 157 (8), 145 (100), 127 (23), 103 (45), 89 (5), 77 (19)

**Anal Calcu. for  $\text{C}_{11}\text{H}_{25}\text{BO}_3\text{Si}$ :** C, 54.10; H, 10.32 found C, 54.39; H 10.43

**[1,3,2]-dioxaborolan-2-yl) triethylsiloxane**

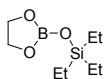

**$^1\text{H}$  NMR ( $\text{CDCl}_3$ ;  $\delta$  (ppm)):** 0.65 (6H, qk,  $\text{Si}(\underline{\text{CH}_2\text{CH}_3})_3$ ), 0.96 (9H, t,  $\text{Si}(\text{CH}_2\underline{\text{CH}_3})_3$ ), 4.17 (s, 4H,  $\text{BO}_2\underline{\text{C}_2\text{H}_4}$ )

**$^{13}\text{C}$  NMR ( $\text{CDCl}_3$ ;  $\delta$  (ppm)):** 5.3 ( $\text{Si}(\underline{\text{CH}_2\text{CH}_3})_3$ ), 6.4 ( $\text{Si}(\text{CH}_2\underline{\text{C}}\text{H}_3)_3$ ), 64.5 ( $\text{BO}_2\underline{\text{C}_2\text{H}_4}$ )

**$^{11}\text{B}$  NMR ( $\text{CDCl}_3$ ,  $\delta$  (ppm)):** 33.5

**$^{29}\text{Si}$  NMR ( $\text{CDCl}_3$ ,  $\delta$  (ppm)):** 18.2

**MS (EI) [ $m/z$  (rel. int. (%))]:** 173 ( $\text{M}^+$ -29 (100)), 161 (36), 145 (53), 117 (43), 107 (28), 79(31), 63(13)

**[1,3,2]-dioxaborolan-2-yl)*tert*-butyldimethylsiloxane**

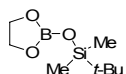

**$^1\text{H}$  NMR ( $\text{CDCl}_3$ ;  $\delta$  (ppm)):** 0.13 (6H, s,  $\text{Si}(\text{CH}_3)_2(\text{t-Bu})$ ), 0.90 (9H, s,  $\text{Si}(\text{CH}_3)_2(\text{C}(\text{CH}_3)_3)$ )  
4.17 (s, 4H,  $\text{BO}_2\text{C}_2\text{H}_4$ )

**$^{13}\text{C}$  NMR ( $\text{CDCl}_3$ ;  $\delta$  (ppm)):** -3.8 ( $\text{Si}(\text{CH}_3)_2(\text{t-Bu})$ ), 18.0 ( $\text{Si}(\text{CH}_3)_2(\text{C}(\text{CH}_3)_3)$ ), 25.7 ( $\text{Si}(\text{CH}_3)_2(\text{C}(\text{CH}_3)_3)$ ), 64.5 ( $\text{BO}_2\text{C}_2\text{H}_4$ )

**$^{11}\text{B}$  NMR ( $\text{CDCl}_3$ ,  $\delta$  (ppm)):** 31.7

**$^{29}\text{Si}$  NMR ( $\text{CDCl}_3$ ,  $\delta$  (ppm)):** 18.4

**MS (EI) [ $m/z$  (rel. int. (%))]:** 145 ( $\text{M}^+$ -57 (100)), 127 (53), 119 (71), 103 (63), 77 (51), 61 (24)

**Anal Calcu. for  $\text{C}_8\text{H}_{19}\text{BO}_3\text{Si}$ :** C, 47.54, H, 9.47; found C, 47.98, H, 9.61

**[1,3,2]-dioxaborinan-2-yl)tris(*tert*-butoxy)siloxane**

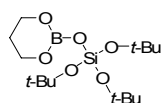

**MS (EI) [ $m/z$  (rel. int. (%))]:** 333 ( $\text{M}^+$ -15), 277 (52), 221 (100), 181 (8), 163 (14), 123 (12), 79 (12), 57 (11)

**[1,3,2]-dioxaborolan-2-yl)tris(*tert*-butoxy)siloxane**

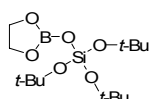

**MS (EI) [ $m/z$  (rel. int. (%))]:** 319 ( $\text{M}^+$ -15 (8)) 297 (5), 263 (24), 207 (100), 167 (5), 149 (5), 123 (19), 79 (8), 57 (11)

**[1,3,2]-dioxaborolan-2-yl)tris(trimethylsiloxy)siloxane**

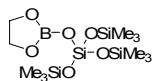

**MS (EI) [*m/z* (rel. int. (%))]:** 367 ( $M^+$ -15 (96)), 323 (2), 309 (22), 281 (100), 267 (9), 251 (5), 235 (4), 207 (3), 193 (7), 73 (19)

**[1,3,2]-dioxaborolan-2-yl)dimethylphenylsiloxane**

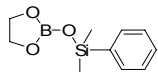

**MS (EI) [*m/z* (rel. int. (%))]:** 207 ( $M^+$ +1, (100)), 189 (18), 165 (31), 147 (60), 137 (39), 121 (28), 103 (34), 91 (27), 77(39)

**References**

- <sup>1</sup> F. E. Brinckman, F. G. A. Stone, *J. Am. Chem. Soc.*, 1960, **82**, 6218.
- <sup>2</sup> H. C. Brown, D. Basavalah, N. G. Bhat, *Organometallics*, 1983, **2**, 1309.
- <sup>3</sup> C. S. Yi, D. W. Lee, Y. Chen, *Organometallics*, 1999, **18**, 2043.
- <sup>4</sup> J. J. Levison, S. D. Robinson, *J. Chem. Soc. A.*, 1970, 2947.
- <sup>5</sup> B. Marciniec, M. Jankowska, C. Pietraszuk, *Chem. Commun.*, 2005, 663.
- <sup>6</sup> G. R. Clark, G. J. Irvine, W. R. Roper, L. J. Wright, *Organometallics*, 1997, **16**, 5499.

**Comment [J2]:** All references were formatted to be consistent
